# Supplementary material
Source: publisher site journal article supplement (https://www.spandidos-publications.com/3035/downloadSupplementary)
Supplement: Supplementary file 1 [file downloadSupplementary]

## Sheet: 工作表1
	Table SI. Medial or lateral microarchitecture of the subchondral trabecular bone alterations between ages.
	Factors	Location	Comparision results between ages
	BMD	Male Medial	1	2	3	4	5	6	7	8	9	10	11
		1		0.6628	0.0735	0.019	0.0041	0.0002	0.0006	<0.0001	0.0002	0.0423	<0.0001
		2			0.1759	0.0562	0.0148	0.001	0.0026	0.0001	0.001	0.1109	0.0002
		3				0.5779	0.2789	0.0524	0.0966	0.0139	0.0542	0.8099	0.0175
		4					0.5987	0.1665	0.269	0.0571	0.1712	0.7522	0.0688
		5						0.3913	0.5626	0.1688	0.3997	0.3997	0.1959
		6							0.7809	0.6039	0.988	0.0893	0.6628
		7								0.4254	0.7924	0.1553	0.475
		8									0.5934	0.0265	0.9341
		9										0.0921	0.6519
		10											0.0327
		11
		Male Lateral	1	2	3	4	5	6	7	8	9	10	11
		1		0.6519	0.0125	0.0021	0.0045	0.0023	0.0002	<0.0001	0.019	0.076	<0.0001
		2			0.0408	0.0085	0.0168	0.0093	0.0009	0.0002	0.0581	0.1857	<0.0001
		3				0.5576	0.7294	0.5779	0.2012	0.0865	0.8805	0.4704	0.0366
		4					0.8099	0.976	0.4891	0.2594	0.4612	0.1908	0.1326
		5						0.8333	0.3512	0.1712	0.6197	0.2857	0.0811
		6							0.4704	0.2469	0.4797	0.2012	0.1251
		7								0.6628	0.1531	0.0455	0.4168
		8									0.0622	0.0148	0.707
		9										0.5677	0.025
		10											0.0049
		11
		Female Medial	1	2	3	4	5	6	7	8	9	10	11
		1		0.4342	0.2175	0.0175	0.0029	0.0003	0.0101	<0.0001	<0.0001	0.0002	<0.0001
		2			0.6519	0.1109	0.0281	0.0047	0.0735	0.0005	0.001	0.0031	0.0008
		3				0.2531	0.0811	0.0175	0.1808	0.0024	0.0047	0.012	0.0035
		4					0.5475	0.2175	0.845	0.0581	0.0921	0.1712	0.076
		5						0.5277	0.6847	0.1959	0.2789	0.4431	0.2408
		6							0.2994	0.5082	0.6519	0.8923	0.5883
		7								0.0893	0.1365	0.2408	0.1143
		8									0.8333	0.5987	0.9042
		9										0.7522	0.9281
		10											0.6847
		11
		Female Lateral	1	2	3	4	5	6	7	8	9	10	11
		1		0.4521	0.1808	0.0455	0.0115	0.001	0.0024	0.0001	0.0001	0.0025	0.0034
		2			0.5576	0.212	0.076	0.0115	0.0223	0.0018	0.0019	0.0232	0.0292
		3				0.5082	0.2348	0.0524	0.0893	0.011	0.0115	0.0921	0.1109
		4					0.5987	0.2012	0.2994	0.0601	0.0622	0.3065	0.3512
		5						0.4521	0.6091	0.1759	0.1808	0.6197	0.6847
		6							0.8099	0.5475	0.5576	0.7982	0.7294
		7								0.3997	0.4082	0.988	0.9162
		8									0.988	0.3914	0.3434
		9										0.3997	0.3512
		10											0.9281
		11
	BV/TV	Male Medial	1	2	3	4	5	6	7	8	9	10	11
		1		0.2348	0.0394	0.019	0.0009	0.0002	0.0007	0.0004	0.0035	0.2531	0.0019
		2			0.3831	0.2469	0.034	0.0093	0.0281	0.0175	0.0837	0.964	0.0562
		3				0.7751	0.212	0.0837	0.1857	0.1326	0.3914	0.359	0.2994
		4					0.3358	0.1488	0.2994	0.2232	0.5677	0.229	0.4521
		5						0.6304	0.9401	0.7982	0.6958	0.0304	0.8333
		6							0.6847	0.8215	0.3831	0.0081	0.4891
		7								0.8568	0.6411	0.025	0.7751
		8									0.5179	0.0155	0.6411
		9										0.076	0.8568
		10											0.0506
		11
		Male Lateral	1	2	3	4	5	6	7	8	9	10	11
		1		0.1759	0.011	0.0037	0.0097	0.0047	0.0035	0.0031	0.5677	0.6091	0.0009
		2			0.2348	0.1214	0.2175	0.1406	0.1178	0.1076	0.4342	0.3997	0.0488
		3				0.7182	0.964	0.7751	0.707	0.6737	0.0488	0.0423	0.4342
		4					0.7522	0.9401	0.988	0.952	0.0198	0.0168	0.6737
		5						0.8099	0.7408	0.707	0.0439	0.038	0.4612
		6							0.9281	0.8923	0.0241	0.0206	0.6197
		7								0.964	0.019	0.0161	0.6847
		8									0.0168	0.0142	0.7182
		9										0.952	0.0059
		10											0.0049
		11
		Female Medial	1	2	3	4	5	6	7	8	9	10	11
		1		0.0455	0.2925	0.0148	0.0013	<0.0001	0.0327	0.001	0.0012	0.0041	0.0005
		2			0.3434	0.6628	0.2232	0.0408	0.8923	0.1959	0.2175	0.3831	0.1326
		3				0.1665	0.0304	0.0028	0.2789	0.025	0.0292	0.0688	0.0142
		4					0.4342	0.1076	0.7636	0.3914	0.4254	0.6628	0.2857
		5						0.4082	0.2789	0.9401	0.988	0.7294	0.7751
		6							0.0562	0.4521	0.4168	0.2408	0.5883
		7								0.2469	0.2723	0.4612	0.1712
		8									0.952	0.6737	0.8333
		9										0.7182	0.7866
		10											0.5277
		11
	Tb.Th	Male Medial	1	2	3	4	5	6	7	8	9	10	11
		1		0.0981	0.0223	0.0018	<0.0001	<0.0001	0.0045	0.0327	0.0052	0.3283	0.0125
		2			0.5277	0.1406	0.0089	0.0023	0.2348	0.6304	0.2531	0.4986	0.3997
		3				0.3997	0.0471	0.0155	0.5779	0.8805	0.6091	0.1908	0.8333
		4					0.2531	0.1143	0.7751	0.3209	0.7408	0.0315	0.5277
		5						0.6628	0.1531	0.0327	0.1406	0.001	0.076
		6							0.0622	0.0101	0.0562	0.0002	0.0271
		7								0.4797	0.964	0.0622	0.7294
		8									0.5082	0.2469	0.7182
		9										0.0688	0.7636
		10											0.1288
		11
		Male Lateral	1	2	3	4	5	6	7	8	9	10	11
		1		0.4612	0.2348	0.1143	0.0241	0.0025	0.4891	0.5277	0.6737	0.1326	0.5576
		2			0.6519	0.3997	0.1288	0.0223	0.964	0.9162	0.2469	0.025	0.8805
		3				0.6958	0.2857	0.0666	0.6197	0.5779	0.1076	0.0071	0.5475
		4					0.4986	0.1488	0.3749	0.3434	0.0455	0.0021	0.3209
		5						0.4431	0.1178	0.1044	0.0074	0.0002	0.0951
		6							0.0198	0.0168	0.0006	<0.0001	0.0148
		7								0.952	0.2658	0.0281	0.9162
		8									0.2925	0.0327	0.964
		9										0.2789	0.3137
		10											0.0366
		11
		Female Medial	1	2	3	4	5	6	7	8	9	10	11
		1		0.026	0.2658	0.0068	0.0001	<0.0001	0.0093	0.038	0.0542	0.0004	0.0005
		2			0.2658	0.6304	0.1012	0.0168	0.7069	0.8805	0.7636	0.1933	0.2147
		3				0.1109	0.0059	0.0005	0.1365	0.3358	0.4168	0.0158	0.0186
		4					0.2469	0.0562	0.9162	0.5276	0.4342	0.4125	0.4476
		5						0.4521	0.2065	0.0735	0.0524	0.7351	0.6902
		6							0.0439	0.011	0.0071	0.2756	0.25
		7								0.5987	0.4986	0.355	0.3872
		8									0.8805	0.1467	0.1642
		9										0.1092	0.1232
		10											0.952
		11
	Tb.N	Male Medial	1	2	3	4	5	6	7	8	9	10	11
		1		0.7982	0.2857	0.359	0.2469	0.5082	0.0137	0.0039	0.0455	0.2723	0.011
		2			0.4168	0.5082	0.3669	0.6847	0.0271	0.0085	0.0811	0.3997	0.0223
		3				0.8805	0.9281	0.6847	0.162	0.0688	0.3512	0.976	0.1406
		4					0.8099	0.7982	0.1214	0.0488	0.2789	0.8568	0.1044
		5						0.6197	0.1908	0.0837	0.3997	0.952	0.1665
		6							0.0711	0.026	0.1808	0.6628	0.0601
		7								0.6737	0.6411	0.1712	0.9401
		8									0.3749	0.0735	0.7294
		9										0.3669	0.5883
		10											0.1488
		11
		Male Lateral	1	2	3	4	5	6	7	8	9	10	11
		1		0.229	0.019	0.0089	0.1251	0.2994	0.0018	0.0017	0.3137	0.1406	0.0001
		2			0.2531	0.1575	0.7408	0.8686	0.0542	0.0524	0.845	0.7866	0.0081
		3				0.7866	0.4168	0.1908	0.4342	0.4254	0.1808	0.3831	0.1326
		4					0.2789	0.1143	0.6091	0.5987	0.1076	0.2531	0.2175
		5						0.6197	0.1109	0.1076	0.5987	0.952	0.0206
		6							0.0366	0.0353	0.976	0.6628	0.0049
		7								0.988	0.034	0.0981	0.4704
		8									0.0327	0.0951	0.4797
		9										0.6411	0.0045
		10											0.0175
		11
		Female Medial	1	2	3	4	5	6	7	8	9	10	11
		1		0.1143	0.3914	0.0455	0.0439	0.0408	0.0811	0.0011	0.0005	0.0506	0.0175
		2			0.4704	0.6737	0.6628	0.6411	0.8686	0.0921	0.0542	0.707	0.4254
		3				0.2531	0.2469	0.2348	0.3749	0.0161	0.0081	0.2723	0.1288
		4					0.988	0.964	0.7982	0.2065	0.1326	0.964	0.707
		5						0.976	0.7866	0.212	0.1365	0.952	0.7182
		6							0.7636	0.2232	0.1447	0.9281	0.7408
		7								0.1288	0.0785	0.8333	0.5277
		8									0.8099	0.1908	0.3749
		9										0.1214	0.2594
		10											0.6737
		11
	SMI	Male Medial	1	2	3	4	5	6	7	8	9	10	11
		1		0.7294	0.0148	0.1044	0.0292	0.229	0.0005	<0.0001	0.0003	0.0009	0.0003
		2			0.0366	0.2012	0.0666	0.3914	0.0018	<0.0001	0.0009	0.0029	0.0012
		3				0.4168	0.7982	0.2175	0.2994	0.0408	0.2232	0.3749	0.2531
		4					0.5779	0.6737	0.0644	0.0043	0.0423	0.0893	0.0506
		5						0.3283	0.1959	0.0214	0.1406	0.2531	0.162
		6							0.0232	0.001	0.0142	0.034	0.0175
		7								0.3137	0.8568	0.8805	0.9162
		8									0.4082	0.2469	0.3669
		9										0.7408	0.9401
		10											0.7982
		11
		Male Lateral	1	2	3	4	5	6	7	8	9	10	11
		1		0.3997	0.0009	0.0062	0.0155	0.1326	0.0005	<0.0001	0.0052	0.0028	<0.0001
		2			0.0131	0.0581	0.1143	0.5082	0.0089	0.001	0.0506	0.0315	<0.0001
		3				0.5576	0.3669	0.0688	0.8923	0.4168	0.5987	0.7408	0.1575
		4					0.7522	0.2175	0.4704	0.162	0.952	0.7982	0.0455
		5						0.359	0.2994	0.0865	0.707	0.5677	0.0206
		6							0.0506	0.0085	0.1959	0.1365	0.0012
		7								0.4986	0.5082	0.6411	0.2012
		8									0.1808	0.2531	0.5475
		9										0.845	0.0524
		10											0.0811
		11
		Female Medial	1	2	3	4	5	6	7	8	9	10	11
		1		0.3997	0.076	0.0062	0.0052	0.0439	0.0025	0.0001	<0.0001	<0.0001	<0.0001
		2			0.3512	0.0581	0.0506	0.2408	0.0292	0.0031	0.0005	0.0008	0.0006
		3				0.3358	0.3065	0.8099	0.212	0.0423	0.011	0.0161	0.012
		4					0.952	0.4704	0.7751	0.2857	0.1143	0.1488	0.1214
		5						0.4342	0.8215	0.3137	0.1288	0.1665	0.1365
		6							0.3137	0.0735	0.0214	0.0304	0.0232
		7								0.4342	0.1959	0.2469	0.2065
		8									0.6091	0.707	0.6304
		9										0.8923	0.976
		10											0.9162
		11
		Female Lateral	1	2	3	4	5	6	7	8	9	10	11
		1		0.1665	0.034	0.0471	0.0045	0.076	0.0054	<0.0001	<0.0001	0.0009	0.0054
		2			0.4612	0.5475	0.1447	0.6958	0.162	0.0068	0.0045	0.0542	0.162
		3				0.8923	0.4704	0.7294	0.5082	0.0488	0.0353	0.2348	0.5082
		4					0.3914	0.8333	0.4254	0.0353	0.025	0.1857	0.4254
		5						0.2857	0.952	0.212	0.1665	0.6411	0.952
		6							0.3137	0.0206	0.0142	0.1251	0.3137
		7								0.1908	0.1488	0.5987	>0.9999
		8									0.8923	0.4342	0.1908
		9										0.359	0.1488
		10											0.5987
		11
	Tb.Pf	Male Medial	1	2	3	4	5	6	7	8	9	10	11
		1		0.5475	0.0292	0.0353	0.0115	0.0951	0.0003	<0.0001	0.0002	0.0014	<0.0001
		2			0.1143	0.1326	0.0542	0.2857	0.0024	<0.0001	0.0019	0.0093	0.0006
		3				0.9401	0.7294	0.6091	0.1447	0.0089	0.1288	0.3065	0.0644
		4					0.6737	0.6628	0.1251	0.0071	0.1109	0.2723	0.0542
		5						0.3914	0.2658	0.0232	0.2408	0.4986	0.1326
		6							0.0488	0.0018	0.0423	0.1251	0.0182
		7								0.2469	0.952	0.6628	0.6958
		8									0.2723	0.1109	0.4431
		9										0.6197	0.7408
		10											0.4082
		11
		Male Lateral	1	2	3	4	5	6	7	8	9	10	11
		1		0.4612	0.0049	0.0021	0.0241	0.0893	<0.0001	<0.0001	0.0085	0.0018	<0.0001
		2			0.038	0.019	0.1288	0.3358	0.0013	0.0012	0.0581	0.0168	<0.0001
		3				0.7866	0.5779	0.2658	0.2531	0.2408	0.8568	0.7522	0.0644
		4					0.4082	0.1665	0.3831	0.3669	0.6519	0.964	0.1143
		5						0.5779	0.0893	0.0837	0.707	0.3831	0.0161
		6							0.0241	0.0223	0.3512	0.1531	0.0031
		7								0.976	0.1857	0.4082	0.4797
		8									0.1759	0.3914	0.4986
		9										0.6197	0.0423
		10											0.1251
		11
		Female Medial	1	2	3	4	5	6	7	8	9	10	11
		1		0.3209	0.2408	0.0068	0.0052	0.0017	0.0043	<0.0001	<0.0001	0.0003	<0.0001
		2			0.8568	0.0865	0.0711	0.0315	0.0622	0.0023	0.0008	0.0081	0.0022
		3				0.1251	0.1044	0.0488	0.0921	0.0041	0.0014	0.0137	0.0039
		4					0.9281	0.6628	0.8805	0.1808	0.0981	0.3512	0.1759
		5						0.7294	0.952	0.212	0.1178	0.3997	0.2065
		6							0.7751	0.3669	0.2232	0.6197	0.359
		7								0.2348	0.1326	0.4342	0.229
		8									0.7522	0.6847	0.988
		9										0.4704	0.7636
		10											0.6737
		11
		Female Lateral	1	2	3	4	5	6	7	8	9	10	11
		1		0.2789	0.3209	0.0951	0.034	0.0206	0.0065	0.0001	<0.0001	0.0047	0.0037
		2			0.9281	0.5576	0.2994	0.2175	0.1012	0.0054	0.0022	0.0811	0.0688
		3				0.4986	0.2594	0.1857	0.0837	0.0041	0.0016	0.0666	0.0562
		4					0.6519	0.5179	0.2925	0.0281	0.0131	0.2469	0.2175
		5						0.845	0.5475	0.0811	0.0423	0.4797	0.4342
		6							0.6847	0.1214	0.0666	0.6091	0.5576
		7								0.2531	0.1531	0.9162	0.8568
		8									0.7751	0.2994	0.3358
		9										0.1857	0.212
		10											0.9401
		11
	DA	Male Lateral	1	2	3	4	5	6	7	8	9	10	11
		1		0.6091	0.0161	0.2408	0.0711	0.1488	0.025	0.1326	0.8923	0.3914	0.0315
		2			0.0581	0.5082	0.1959	0.3512	0.0837	0.3209	0.5179	0.1712	0.1012
		3				0.2175	0.5475	0.3358	0.8686	0.3669	0.011	0.0011	0.7982
		4					0.5277	0.7866	0.2857	0.7408	0.1908	0.0423	0.3283
		5						0.7182	0.6628	0.7636	0.0524	0.0078	0.7294
		6							0.4254	0.952	0.1143	0.0214	0.4797
		7								0.4612	0.0175	0.0019	0.9281
		8									0.1012	0.0182	0.5179
		9										0.4704	0.0223
		10											0.0026
		11
		Female Medial	1	2	3	4	5	6	7	8	9	10	11
		1		0.0601	0.5082	0.0622	0.0041	0.0025	0.2531	0.0023	0.0005	0.0131	0.0292
		2			0.2232	0.988	0.3209	0.2531	0.4612	0.2408	0.1044	0.5475	0.7636
		3				0.229	0.0271	0.0182	0.6304	0.0168	0.0045	0.0688	0.1288
		4					0.3137	0.2469	0.4704	0.2348	0.1012	0.5375	0.7522
		5						0.8805	0.0837	0.8568	0.5277	0.6958	0.4891
		6							0.0601	0.976	0.6304	0.5883	0.3997
		7								0.0562	0.0182	0.1808	0.2994
		8									0.6519	0.5677	0.3831
		9										0.3065	0.1857
		10											0.7636
		11
	Note:BV/TV, bone volume fraction; Tb. Th, trabecular thickness; Tb. N, trabecular number; SMI, structure model index; Tb. Pf, trabecular bone pattern factor;
	DA, degree of anisotropy; BMD, the bone mineral density.
	1 to 11	Represents ages ( months)
	Bold values	P value <0.05
